# Supplementary material for: Lanthanide coordination polymers with hexa-carboxylate ligands derived from cyclotriphosphazene as bridging linkers: synthesis, thermal and luminescent properties
Source: Royal Society of Chemistry journal article supplement (doi:10.1039/c3ce41060a), 2013-01-01
Supplement: c3ce41060a.pdf [file c3ce41060a.pdf]

# **Lanthanide Metal-Organic Frameworks with Hexa-carboxylate Ligands Derived From Cyclotriphosphazene as Bridging Linkers: Synthesis, Thermal and Luminescent Properties**

Wen-Jing Yu,<sup>a</sup> Jia Li,<sup>b</sup> Bao Li,<sup>a,\*</sup> Tianle Zhang,<sup>a,\*</sup> Jun Tao<sup>b</sup>

<sup>a</sup> School of Chemistry and Chemical Engineering, Huazhong University of Science and Technology, Wuhan, Hubei 430074, P.R. China; <sup>b</sup> State Key Laboratory of Physical Chemistry of Solid Surfaces and Department of Chemistry, College of Chemistry and Chemical Engineering, Xiamen University, Xiamen 361005, People's Republic of China

---

## Experimental sections:

**Materials and General Methods.** All reagents were purchased from commercial sources and were used without further purification. FT–IR spectra were recorded as KBr pellets with an Equinox 55 FT–IR spectrophotometer (4000–400  $\text{cm}^{-1}$ ). Thermal gravimetric analyses (TGA) were performed under  $\text{N}_2$  atmosphere (100 ml/min) with a heating rate of  $4^\circ\text{C}/\text{min}$  between ambient temperature and  $500^\circ\text{C}$  using a Pyris1 thermogravimetric analyzer. Powder X-ray diffraction (PXRD) data were collected over the  $2\theta$  range  $5\sim 60^\circ$  using a X'Pert PRO automated diffractometer at room temperature, with a step size of  $0.02^\circ$  in  $2\theta$  angle. The hexa-carboxylate ligand was synthesized according to the literature.<sup>1</sup>

**Synthesis of  $\{[\text{Eu}_2(\text{C}_{42}\text{H}_{24}\text{O}_{18}\text{P}_3\text{N}_3)(\text{H}_2\text{O})_4]\cdot(\text{H}_2\text{O})_4\cdot(\text{C}_2\text{H}_7\text{N})_2\}_n$  (1).** A mixture of  $\text{Eu}(\text{NO}_3)_3\cdot 6\text{H}_2\text{O}$  ( 23 mg ), H6L1 ( 12 mg ) was dissolved in 15 mL of DMF/ $\text{H}_2\text{O}$  (1:2, v/v), and then pH value was adjusted to 2-3. The final mixture was heated at  $130^\circ\text{C}$  under autogenous pressure for 120 hours in 10 Parr Teflon-lined stainless steel vessels, and then cooled to room temperature. The resulting solution was standed undisturbedly from which square-like crystals were obtained. The crystals were collected together, washed with mother liquid, and dried under ambient conditions. Yield of the reaction was ca. 43% based on H<sub>6</sub>L1. Anal. Calcd for dyhydrated  $\text{C}_{46}\text{H}_{54}\text{Eu}_2\text{N}_5\text{O}_{26}\text{P}_3$ : C, 37.09%, H, 3.65%, N, 4.70%; found C, 36.79%, H, 4.02%, N, 4.67%. IR (KBr,  $\text{cm}^{-1}$ ): 3481, 1603, 1543, 1420, 1384, 1210, 1159, 966, 790.

**Synthesis of  $\{[\text{Eu}_2(\text{C}_{42}\text{H}_{24}\text{O}_{18}\text{P}_3\text{N}_3)(\text{H}_2\text{O})_8]\cdot(\text{H}_2\text{O})_2\cdot\text{C}_2\text{H}_7\text{N}\}_n$  (2).** The synthesis process was very similar to **1** except adding 4,4-bipyridine 14mg in the reaction system, adjusting the pH range located in 4~5 and for 96 hours. Square-like crystals were directly obtained, and crystals were filtered off, washed with mother liquid, and dried under ambient conditions. Yield of the reaction was ca. 40% based on H6L1. Calcd for dyhydrated  $\text{C}_{44}\text{H}_{51}\text{Eu}_2\text{N}_4\text{O}_{28}\text{P}_3$ : C, 35.69%, H, 3.47%, N, 3.78%; found C, 35.92%, H, 3.03%, N, 3.98%. IR (KBr,  $\text{cm}^{-1}$ ): 3418, 1604, 1540, 1420, 1384, 1211, 1159, 967, 790.

**Synthesis of  $\{[\text{Eu}_2(\text{C}_{42}\text{H}_{24}\text{O}_{18}\text{P}_3\text{N}_3)(\text{H}_2\text{O})_3(\text{DMF})]\cdot(\text{H}_2\text{O})_2\cdot(\text{C}_2\text{H}_7\text{N})\}_n$  (**3**).** The synthesis process was very similar to **1** except adding  $\text{H}_6\text{L2}$  12mg in the reaction system and adjusting the pH range located in 3~4. Square-like crystals were directly obtained, and crystals were filtered off, washed with mother liquid, and dried under ambient conditions. Yield of the reaction was ca. 34% based on  $\text{H}_6\text{L2}$ . Calcd for dyhydrated  $\text{C}_{47}\text{H}_{48}\text{Eu}_2\text{N}_5\text{O}_{24}\text{P}_3$  : C, 38.57%, H, 3.31%, N, 4.78%; found C, 39.02%, H, 3.81%, N, 5.02%. IR (KBr,  $\text{cm}^{-1}$ ): 3418, 1604, 1540, 1420, 1384, 1211, 1159, 966, 789.

**X-Ray Structural Determination.** Suitable single crystals were selected and mounted onto the end of a thin glass fiber. X-ray intensity data were measured on a Bruker SMART APEX CCD for **1** - **3** based diffractometer with graphite-monochromated Mo  $\text{K}\alpha$  radiation.<sup>2</sup> The structure was solved by direct methods and refined by full-matrix least squares using the *SHELXTL* crystallographic software package.<sup>3</sup> All the non-hydrogen atoms were refined anisotropically, except for O6w and O7w for **1**. The hydrogen atoms were generated theoretically onto the specific atoms and refined isotropically with fixed thermal factors. The hydrogen atoms of the coordinated water molecules were not located for compounds **1-3**. In compound **1-3**, because of disorder, thermal parameters of disordered atoms and Ow atoms were restrained. In addition, due to the highly disordered solvent molecules in compounds **1-3**, the PLATON/SQUEEZE routine<sup>4</sup> was employed to calculate the diffraction contribution from the solvent molecules, and thereby to produce a set of solvent-free diffraction intensities. Not unusual for large flexible complexes might be responsible for the CheckCIF B alert PLAT094 of **1** and **2**. The final formula were derived from crystallographic data combined with elemental and thermogravimetric analyses data. Details of the crystal parameters, data collection and refinements for complexes **1-3** are summarized in Table 1. Selected bond lengths and angles are shown in Table S1. CCDC 926681 (**1**), CCDC 926682 (**2**) and CCDC 926683 (**3**) contain the supplementary crystallographic data for this paper. The data can be obtained free of charge at [www.ccdc.cam.ac.uk/conts/retrieving.html](http://www.ccdc.cam.ac.uk/conts/retrieving.html).

Reference:

- 1 Chandrasekhar, V.; Krishnan, V.; Steiner, A.; Bickley, J. F. *Inorg. Chem.*, **2004**, *43*, 166.
- 2 SMART and SAINT, *Area Detector Software Package and SAX Area Detector Integration Program*; Bruker Analytical X-Ray; Madison, WI, USA, **1997**.
- 3 G. M. Sheldrick, *SHELXTL-PLUS, Crystal Structure Analysis Package*; Bruker Analytical X-Ray; Madison, WI, USA, **1997**.
4. PLATON program: A. L. Spek, *Acta Crystallogr. Sect. A*, **1990**, *46*, 194.

**Table S1** the selected bond length of 1-3

| Compound 1 |            | Compound 2 |           | Compound 3 |           |
|------------|------------|------------|-----------|------------|-----------|
| Eu1 O13    | 2.397(8)   | Eu1 O6     | 2.367(7)  | Eu1 O3     | 2.353(5)  |
| Eu1 O2W    | 2.401(7)   | Eu1 O3     | 2.393(7)  | Eu1 O8     | 2.356(4)  |
| Eu1 O14    | 2.419(8)   | Eu1 O11    | 2.411(7)  | Eu1 O19    | 2.392(5)  |
| Eu1 O10    | 2.427(7)   | Eu1 O10    | 2.428(7)  | Eu1 O2     | 2.406(5)  |
| Eu1 O11    | 2.436(7)   | Eu1 O8     | 2.437(7)  | Eu1 O15    | 2.458(5)  |
| Eu1 O1W.   | 2.449(8)   | Eu1 O14    | 2.439(8)  | Eu1 O9     | 2.469(4)  |
| Eu1 O2     | 2.508(7)   | Eu1 O13    | 2.441(8)  | Eu1 O1W    | 2.483(5)  |
| Eu1 O1     | 2.525(8)   | Eu1 O9     | 2.611(7)  | Eu1 O14    | 2.549(5)  |
| Eu1 O13    | 2.828(8)   | Eu1 O2     | 2.838(7)  | Eu1 O8     | 2.678(4)  |
| Eu1 Eu1    | 4.1356(12) | Eu1 C21    | 2.908(10) | Eu1 Eu1    | 3.9646(6) |
| Eu2 O17    | 2.392(7)   |            |           | Eu2 O2W    | 2.379(8)  |
| Eu2 O16    | 2.399(7)   |            |           | Eu2 O18    | 2.375(8)  |
| Eu2 O4     | 2.399(7)   |            |           | Eu2 O11    | 2.386(7)  |
| Eu2 O4W    | 2.414(9)   |            |           | Eu2 O12    | 2.422(7)  |
| Eu2 O7     | 2.464(7)   |            |           | Eu2 O6     | 2.427(5)  |
| Eu2 O5     | 2.474(8)   |            |           | Eu2 O3W    | 2.464(8)  |
| Eu2 O3W    | 2.497(10)  |            |           | Eu2 O17    | 2.477(7)  |
| Eu2 O8     | 2.509(9)   |            |           | Eu2 O5     | 2.593(7)  |
| Eu2 O4     | 2.747(7)   |            |           | Eu2 O18    | 2.679(6)  |
| Eu2 Eu2    | 4.0678(11) |            |           | Eu2 Eu2    | 4.0940(9) |

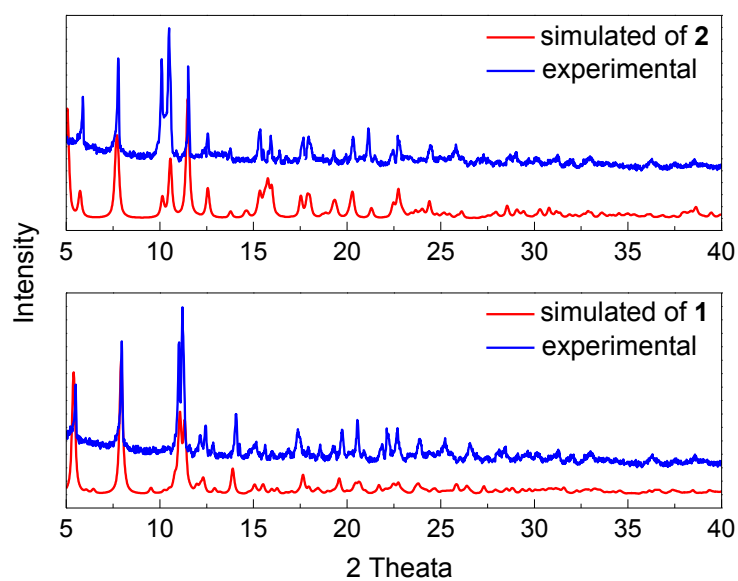

**Fig. S1** XRD spectrum of **2**

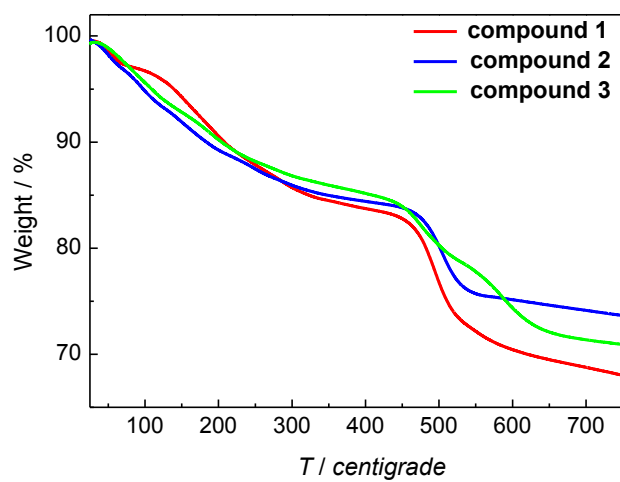

**Fig. S2** TGA curve of **1 - 3**.
